# Supplementary material for: Investigation of the role of filtration in suppressing laser-induced nucleation of glycine
Source: Royal Society of Chemistry journal article supplement (doi:10.1039/d5ce00516g), 2025-01-01
Supplement: d5ce00516g1.pdf [file d5ce00516g1.pdf]

# Investigation of the role of filtration in suppressing laser-induced nucleation of glycine

Thomas Kendall<sup>1,2,1</sup>, Divia Hobson<sup>1</sup>, Nadeem Javid<sup>3</sup>, Iain Burns<sup>1</sup>, Jan Sefcik<sup>1,22</sup>

<sup>1</sup>Department of Chemical and Process Engineering, University of Strathclyde, 75 Montrose Street, Glasgow, G1 1XJ, UK

<sup>2</sup>CMAC, Technology and Innovation Centre, University of Strathclyde, 99 George Street, Glasgow, G1 1RD, UK

<sup>3</sup>School of Chemical & Forensic Sciences, University of Bradford, Richmond Road, Bradford, BD7 1DP, UK

## Supplementary Data

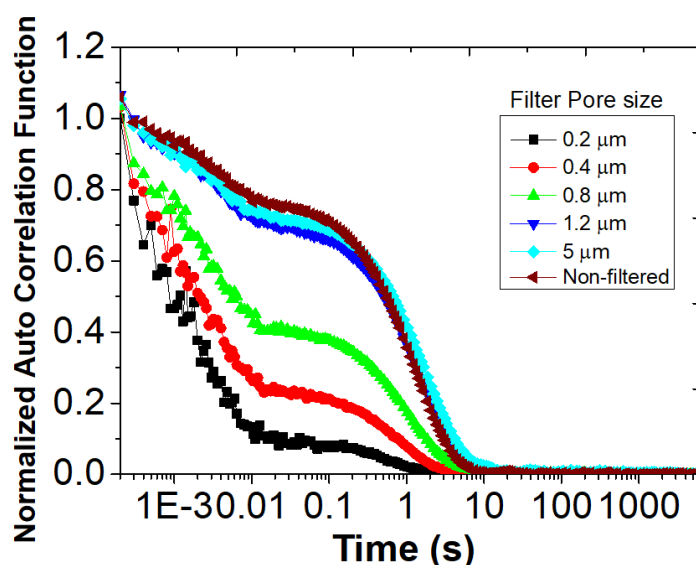

**Figure S1:** Normalised DLS autocorrelation functions for glycine solutions at 25°C with 1.5 supersaturation, filtered with PES of various pore sizes, as well as non-filtered.

<sup>1</sup> Present address: Technobis, Pyrietstraat 2, 1812 SC Alkmaar, The Netherlands

<sup>2</sup> Corresponding author: jan.sefcik@strath.ac.uk
